# Supplementary material
Source: PubMed Central journal article supplement (PMC5087997)

**Figure S1. Generation and characterization of hiPSCs.**

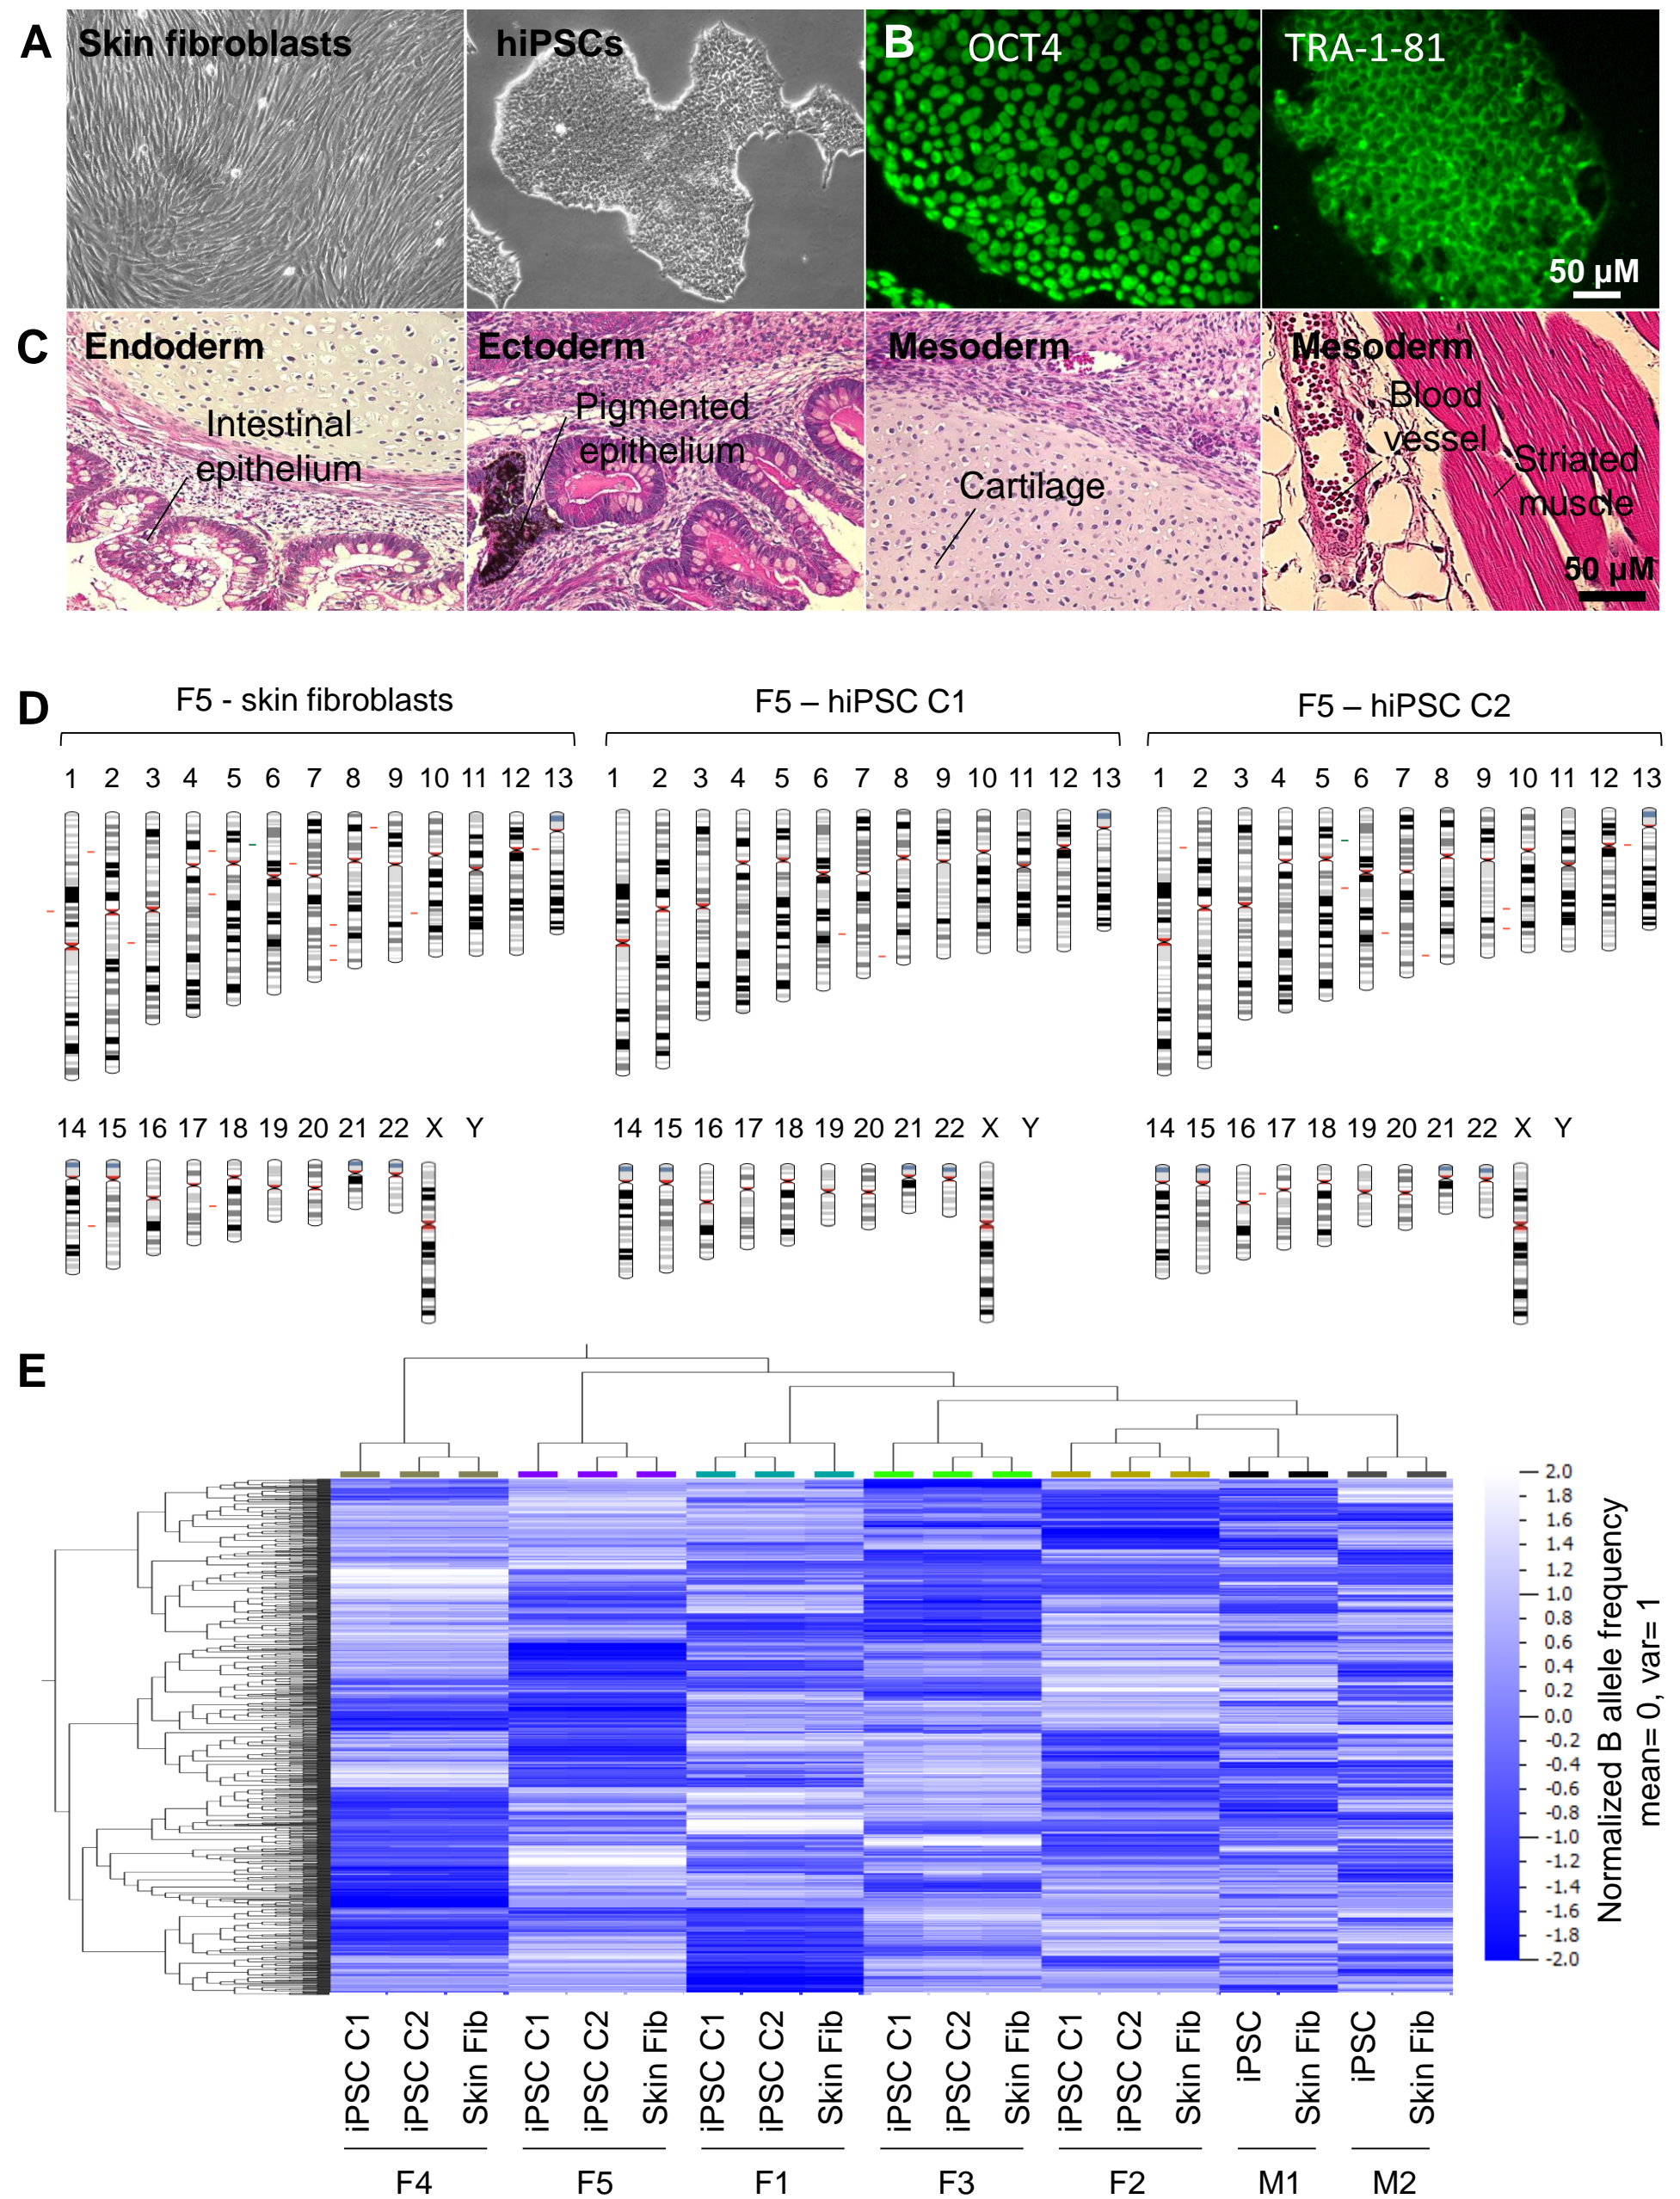

# Figure S2. Generation and characterization of hiPSC-ECs and hiPSC-CMs.

**A**

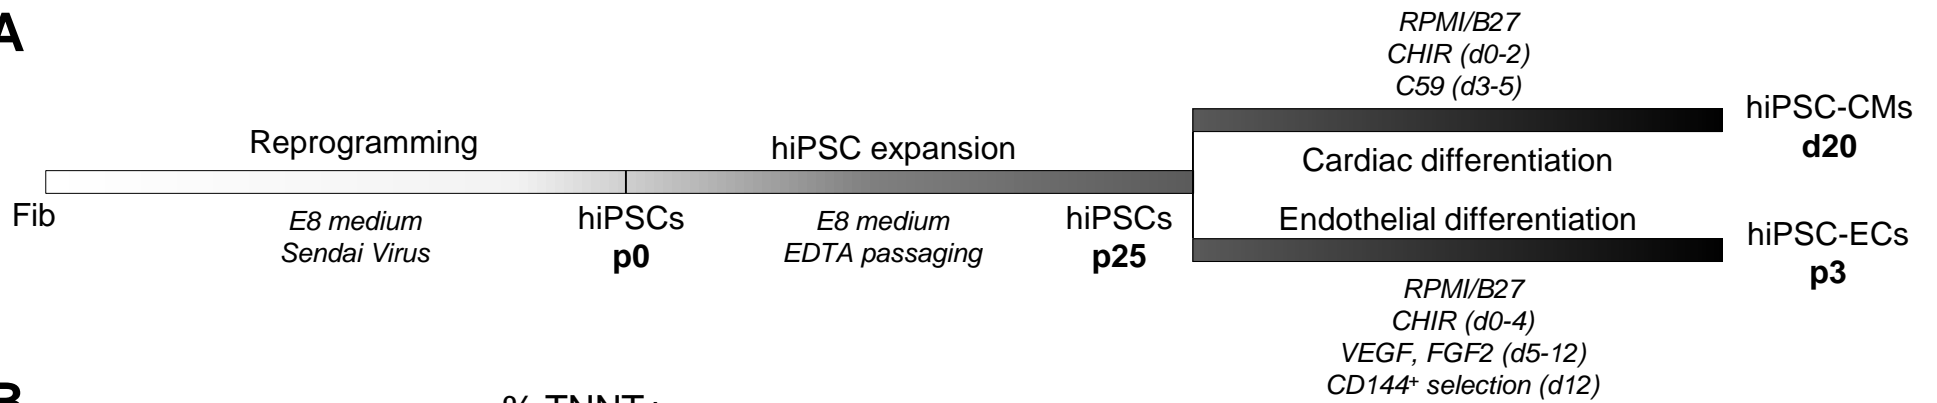

**B**

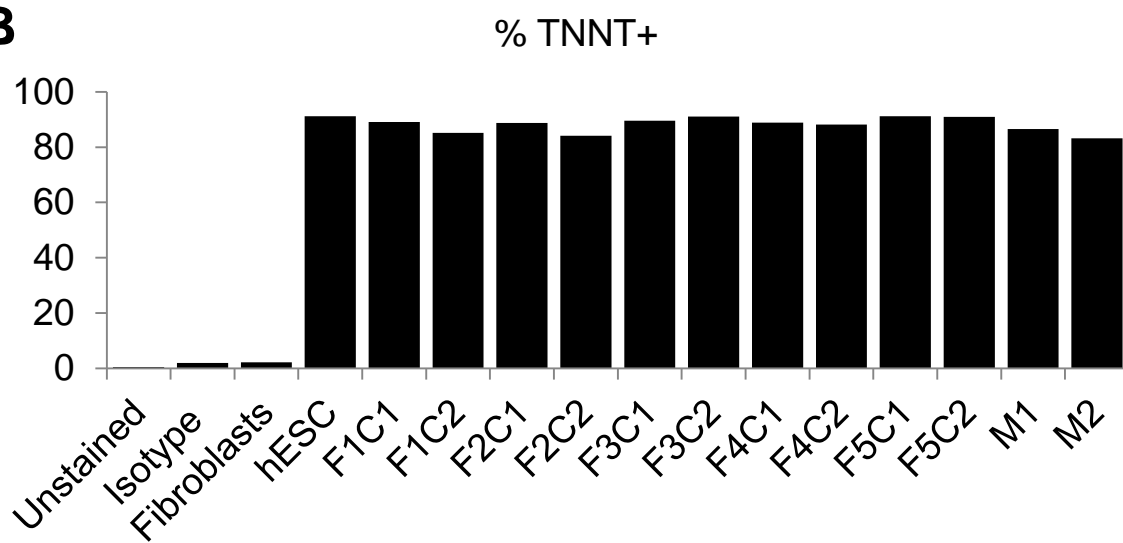

**F**

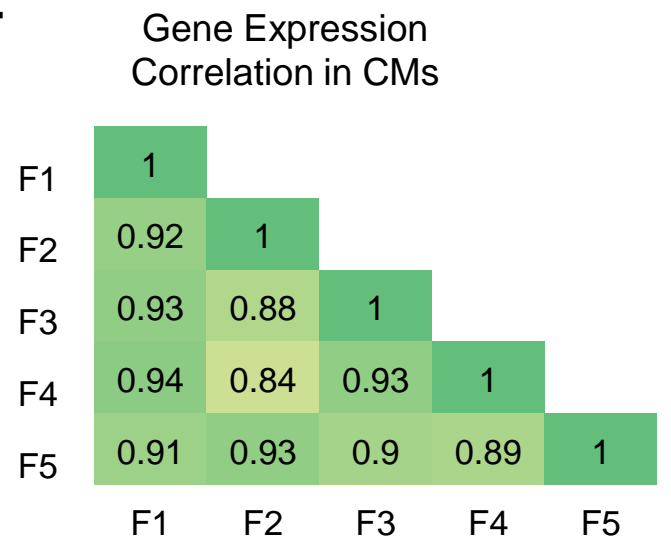

**C**

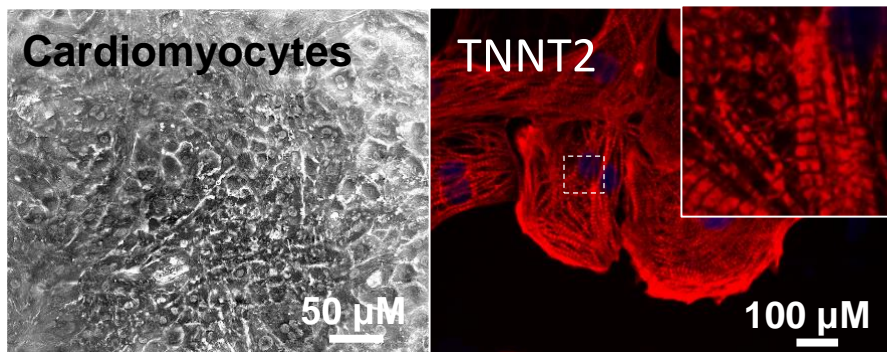

**D**

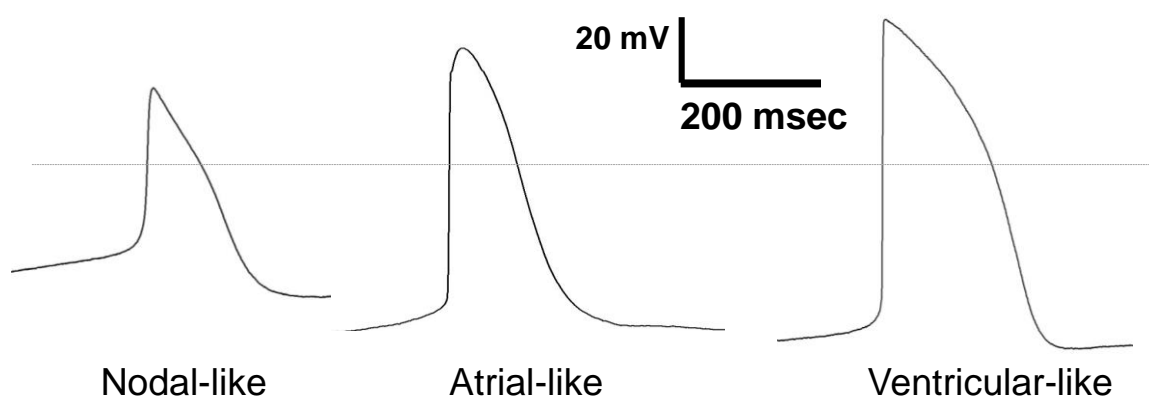

**E**

Cardiomyocyte sub-type identity

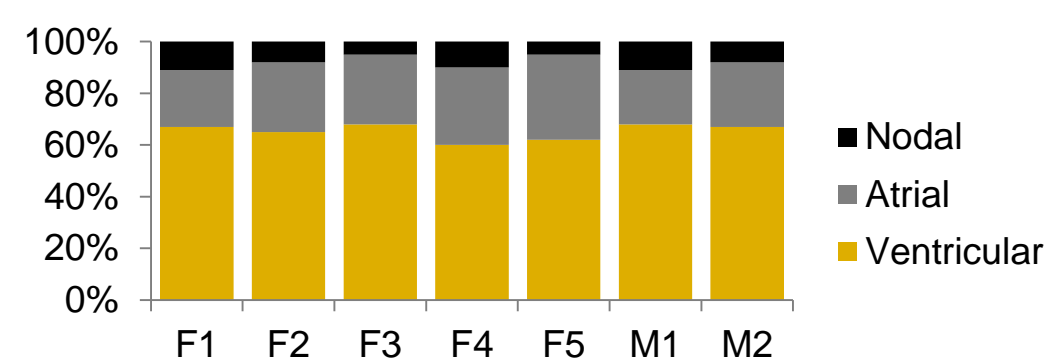

**G**

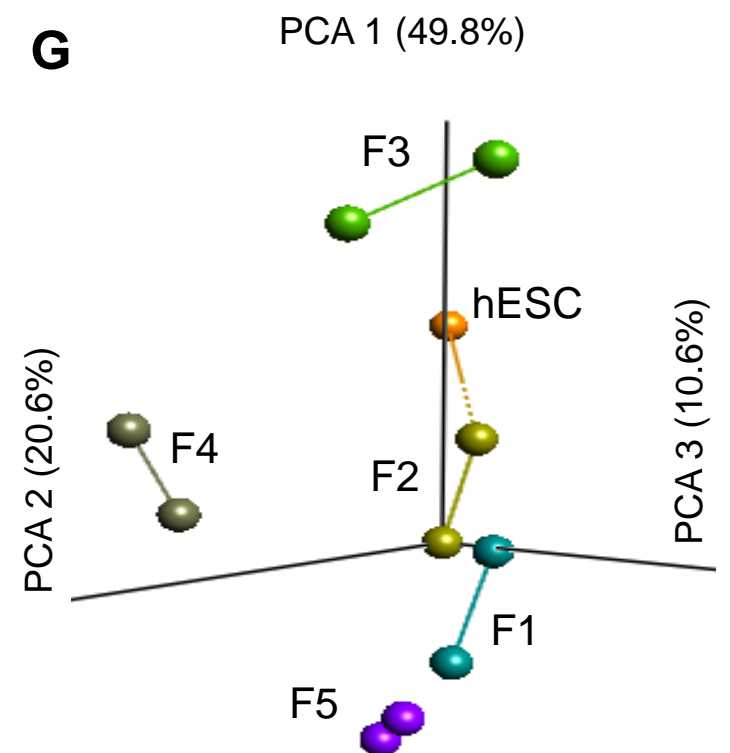

**H**

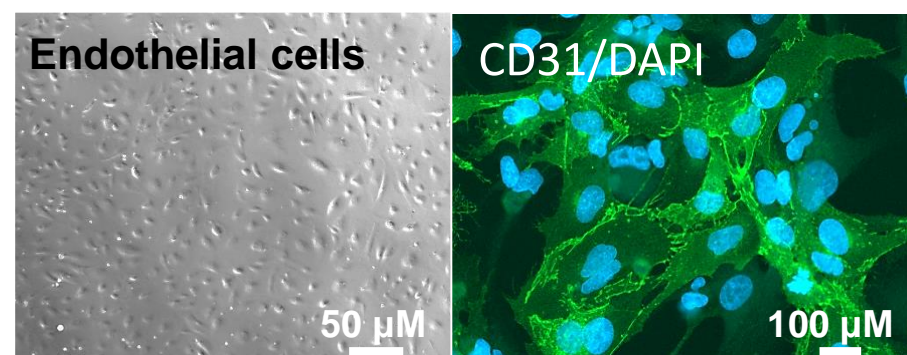

**Figure S3. Transcriptomic comparison of isogenic LV tissue vs. hiPSC-CMs.**

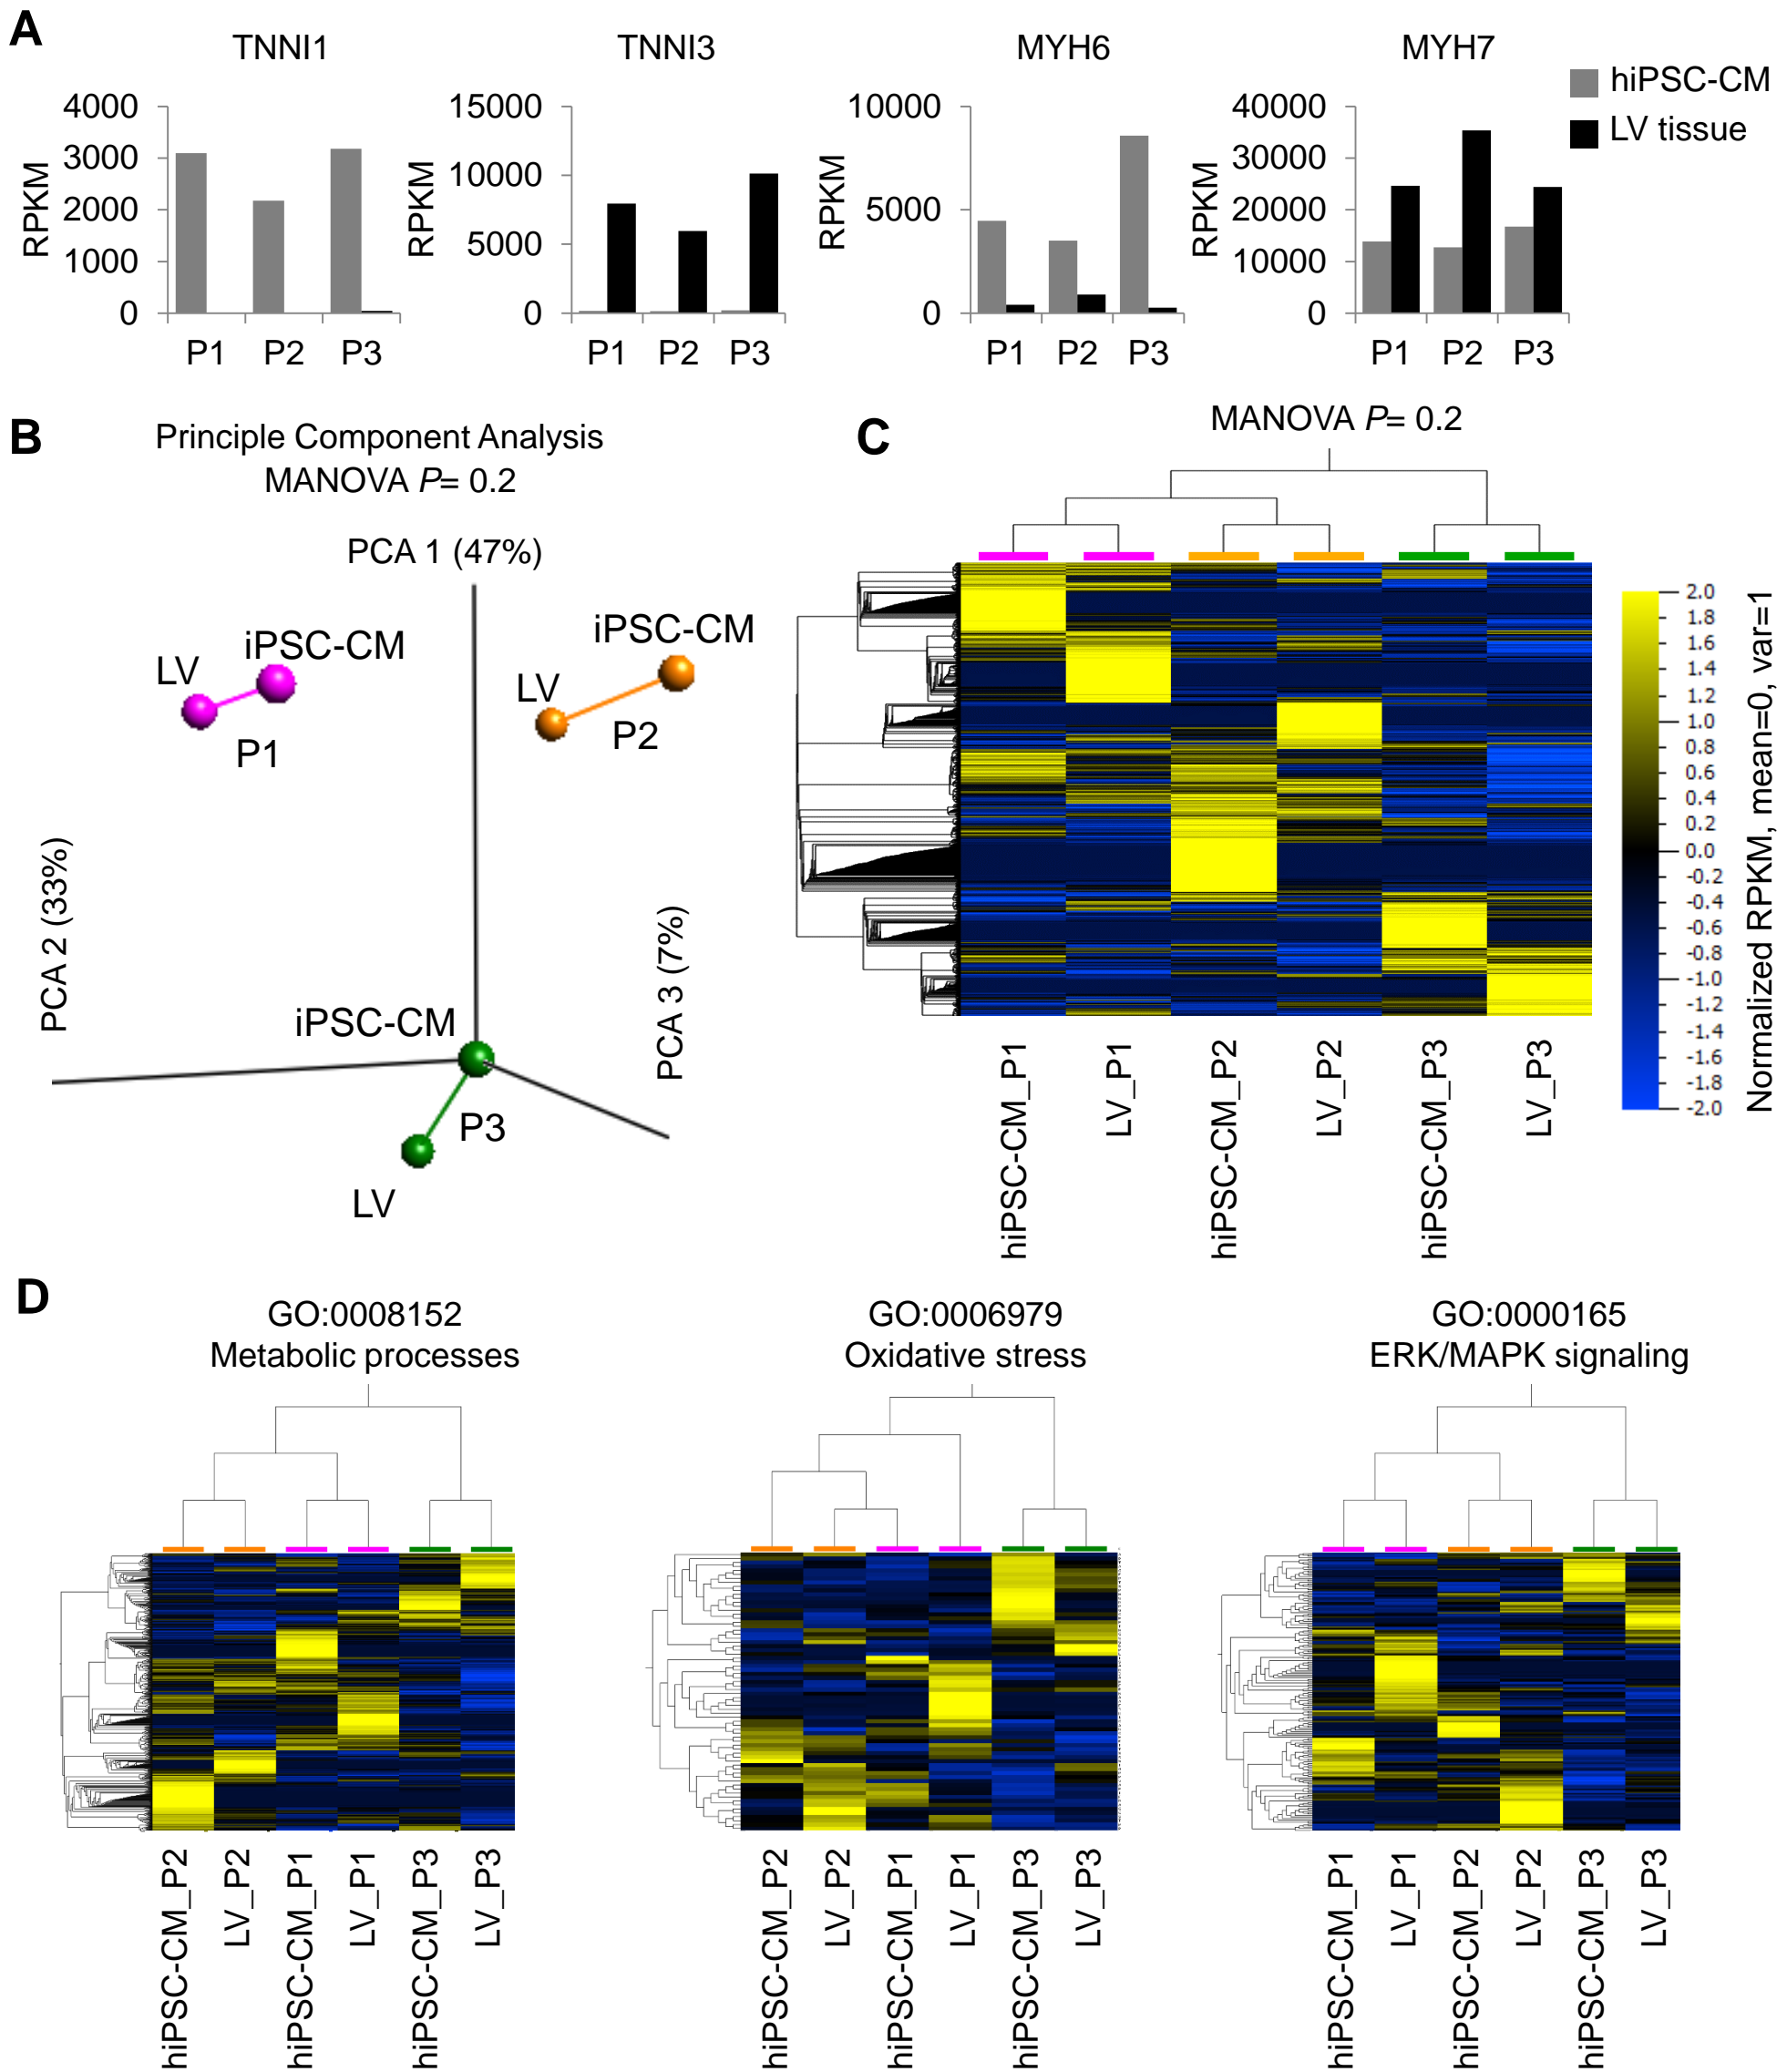

**Figure S4. Live/dead staining for determination of optimal drug concentrations.**

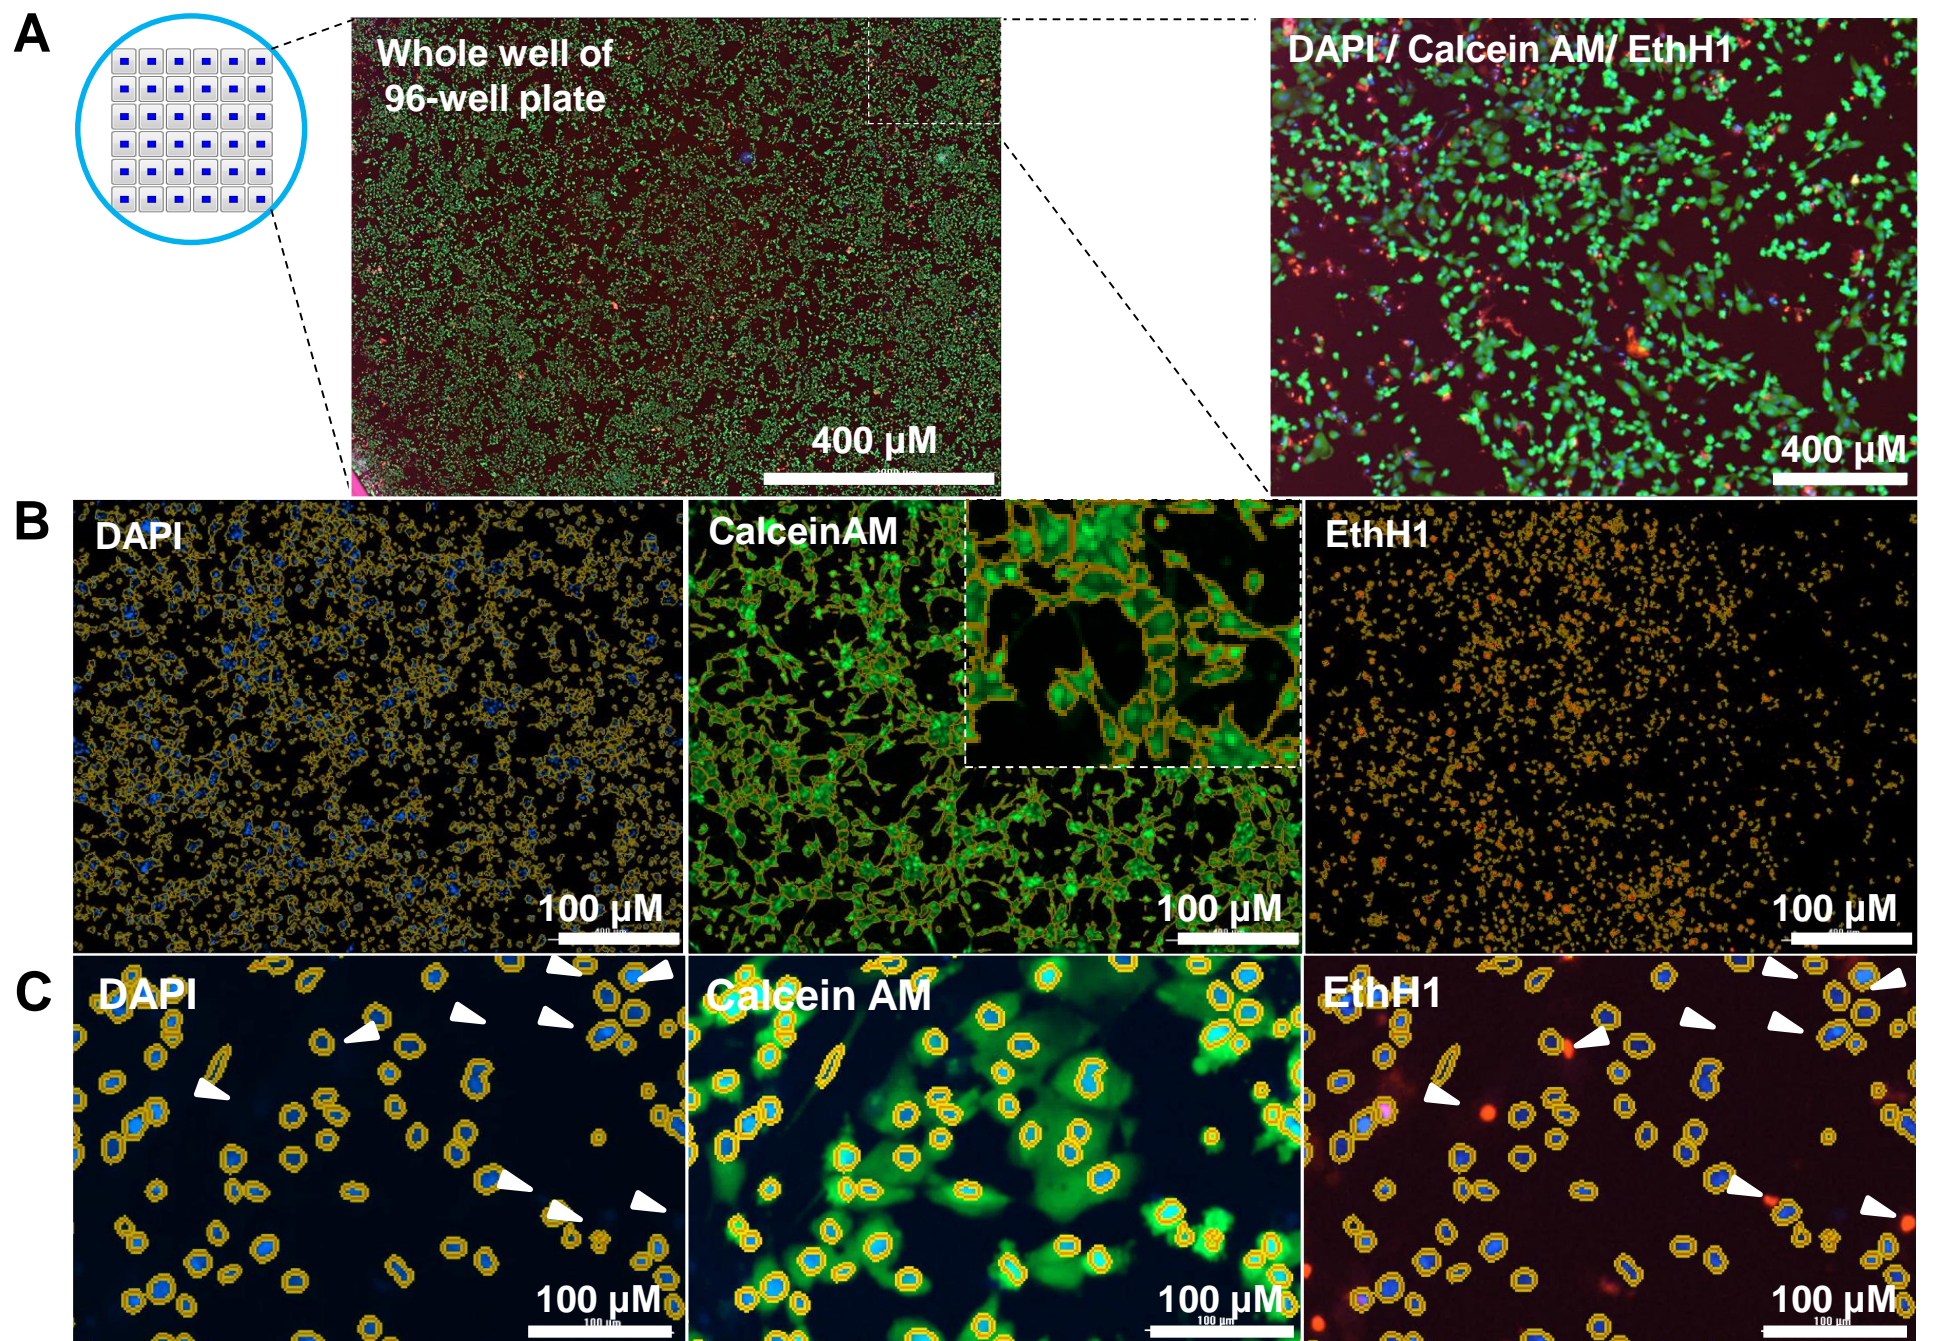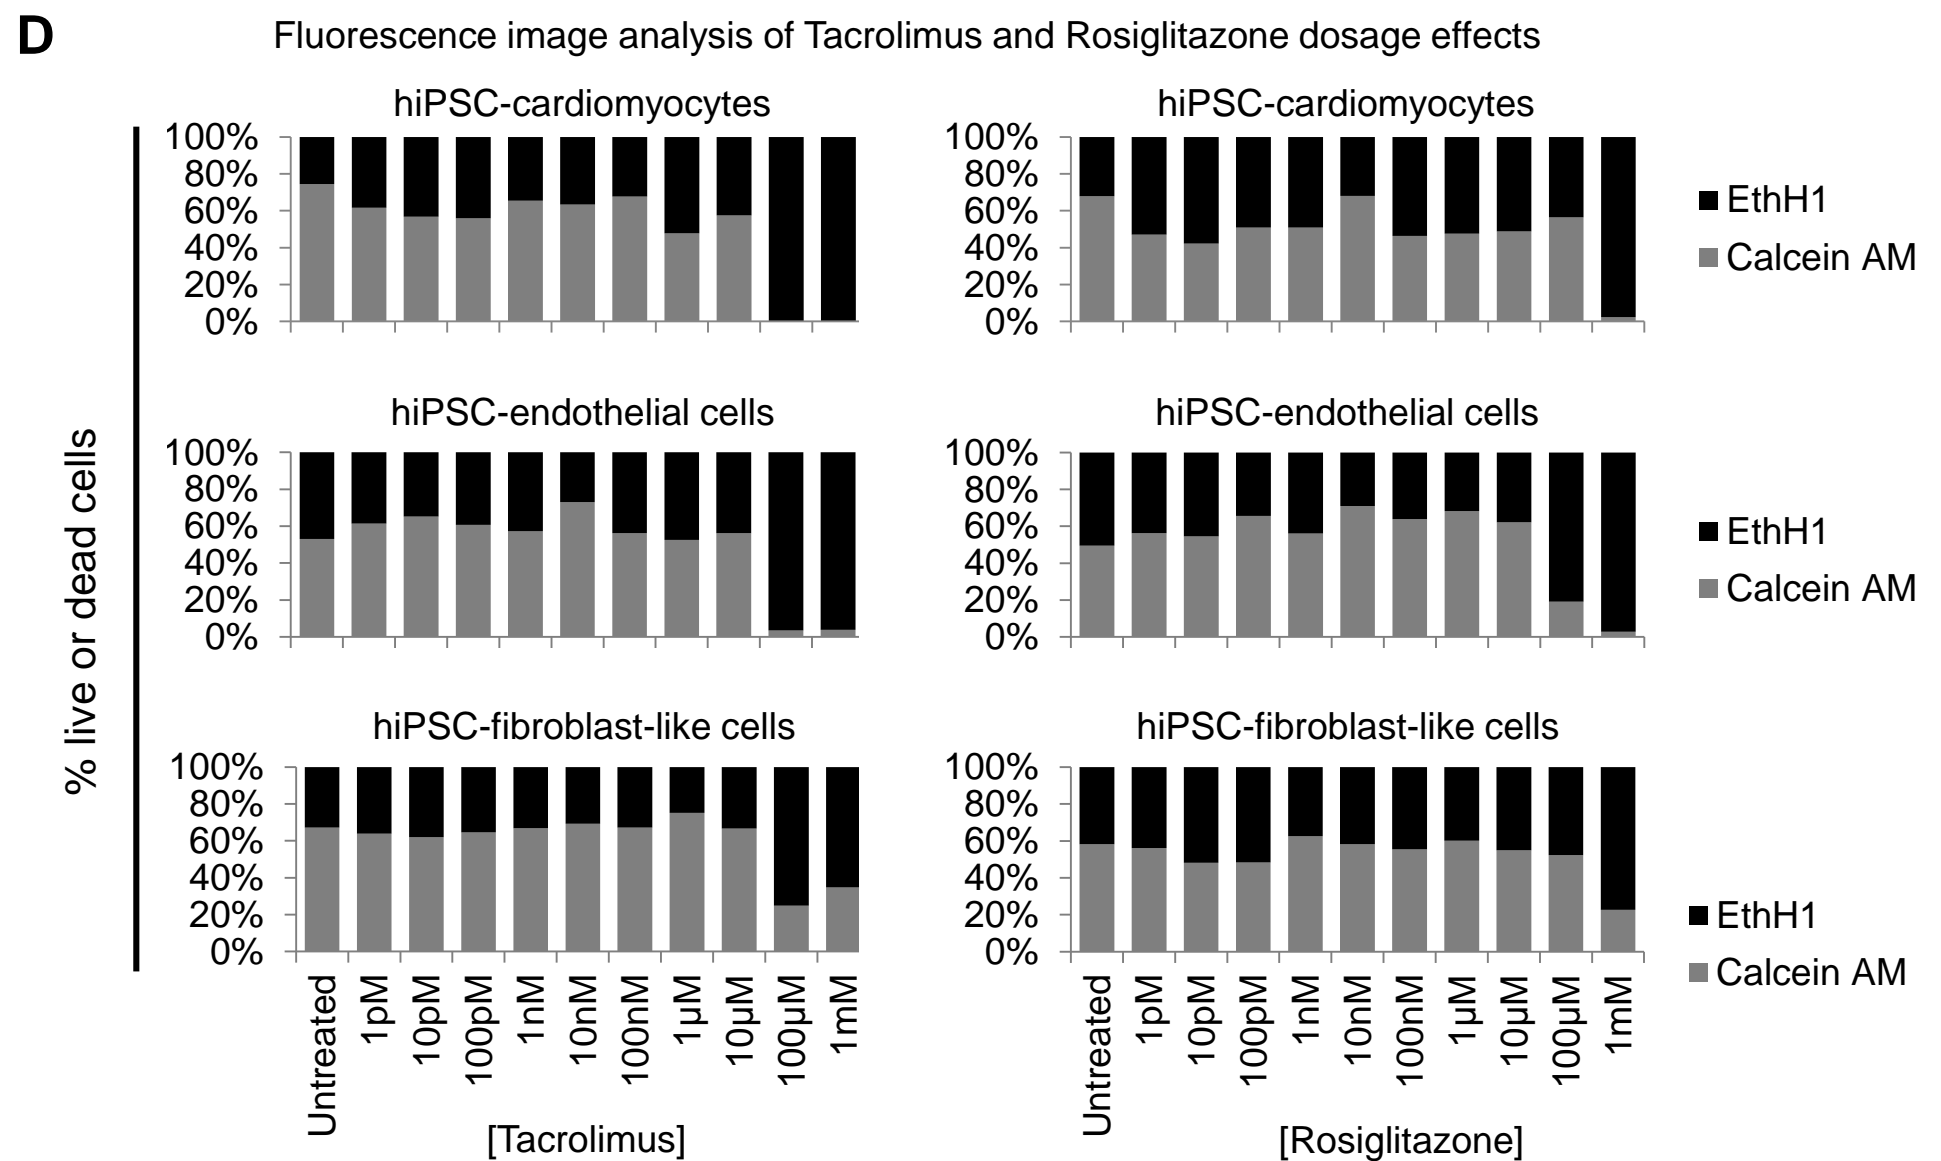

# Figure S5. Contractility analysis for determination of optimal drug concentration

## A Raw signal of cardiomyocyte contraction / relaxation

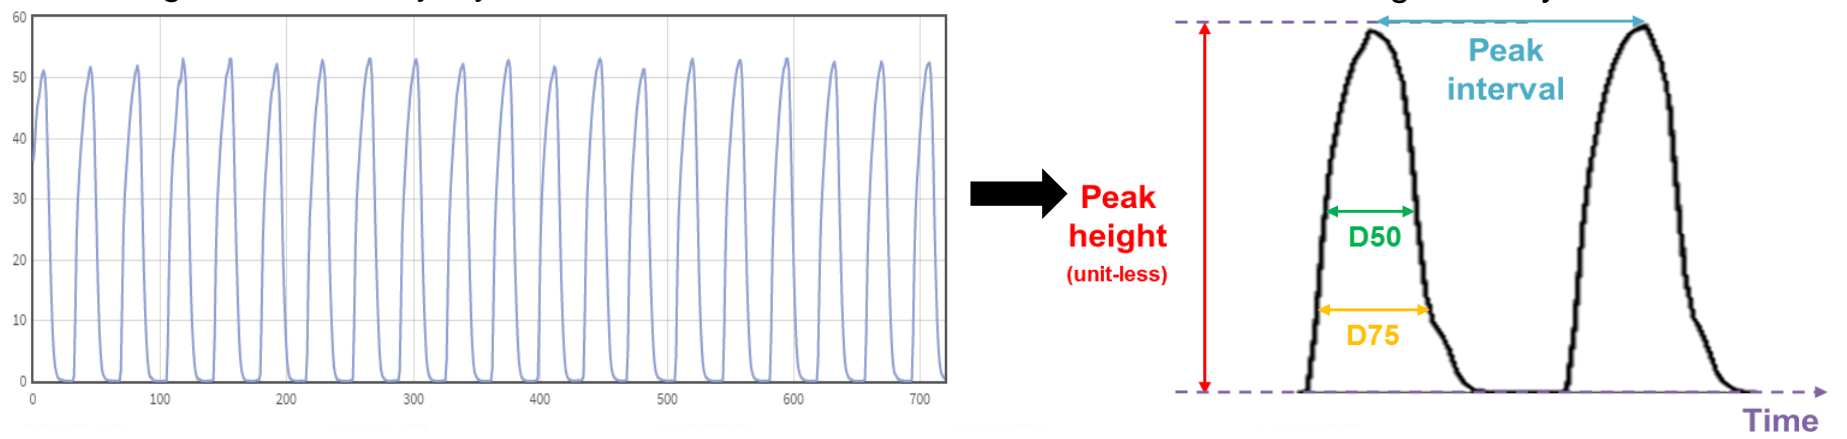

## B

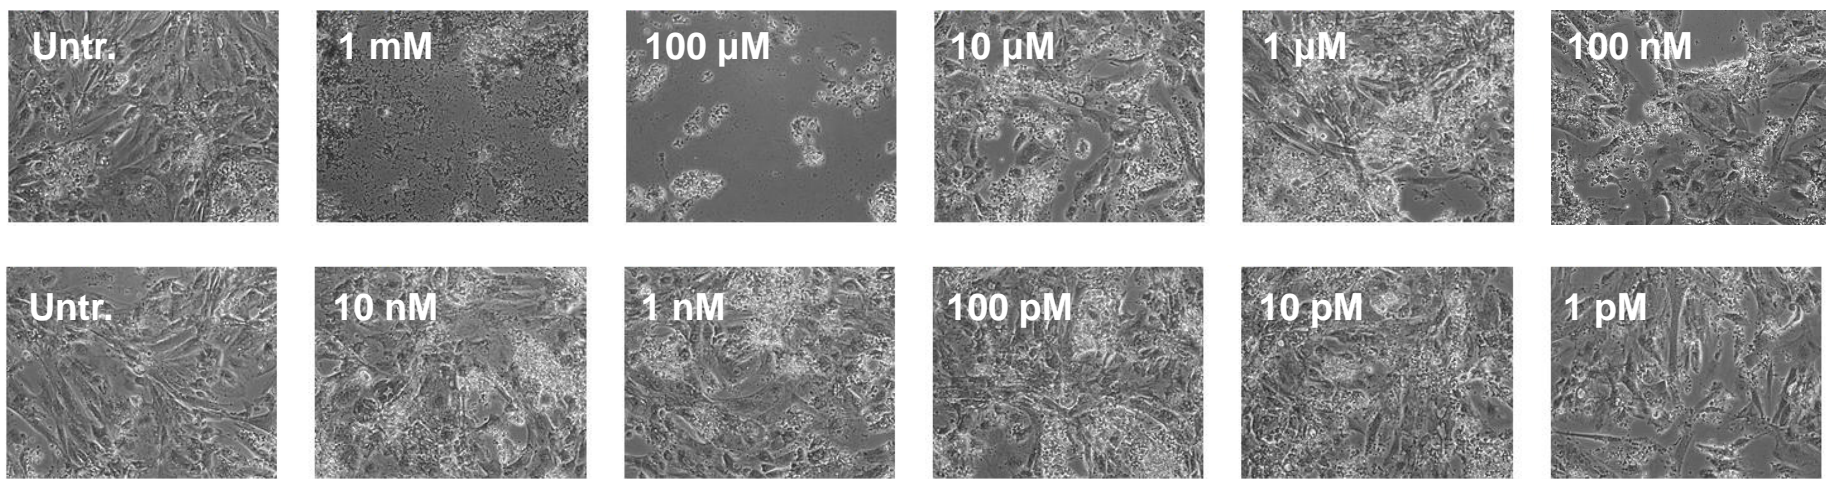

## C

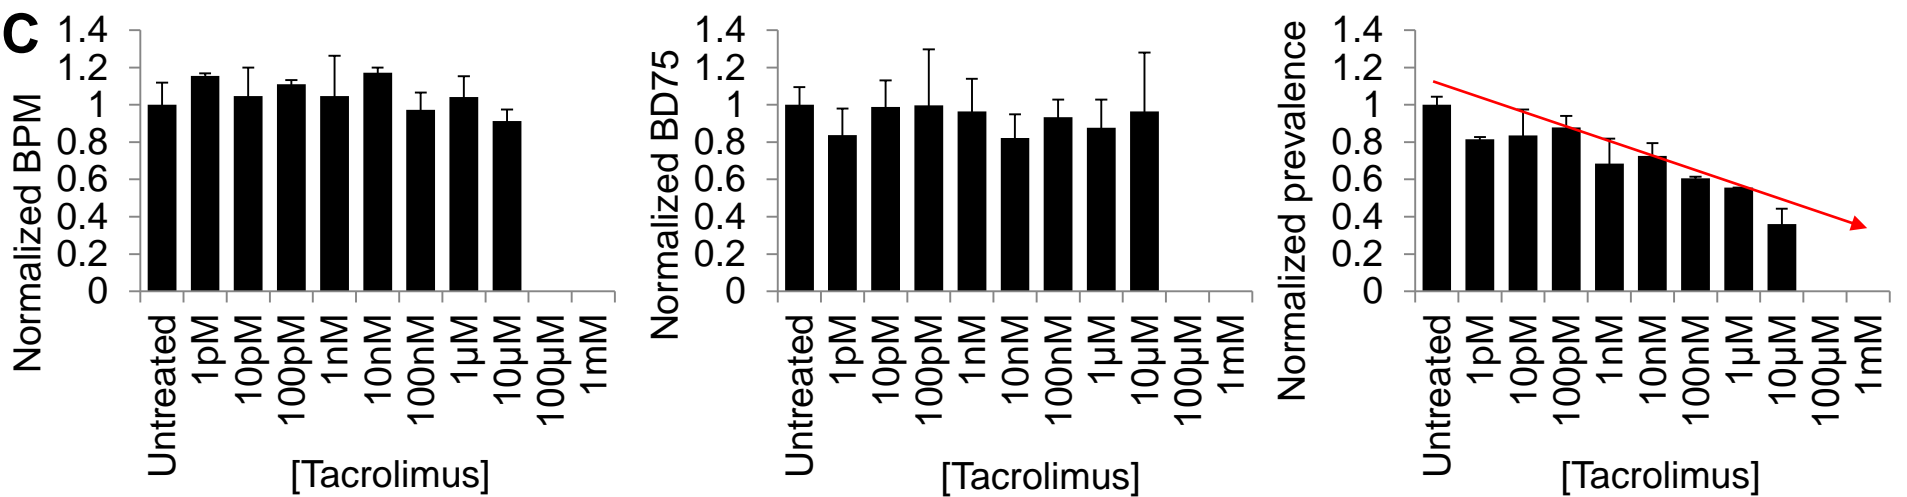

## D

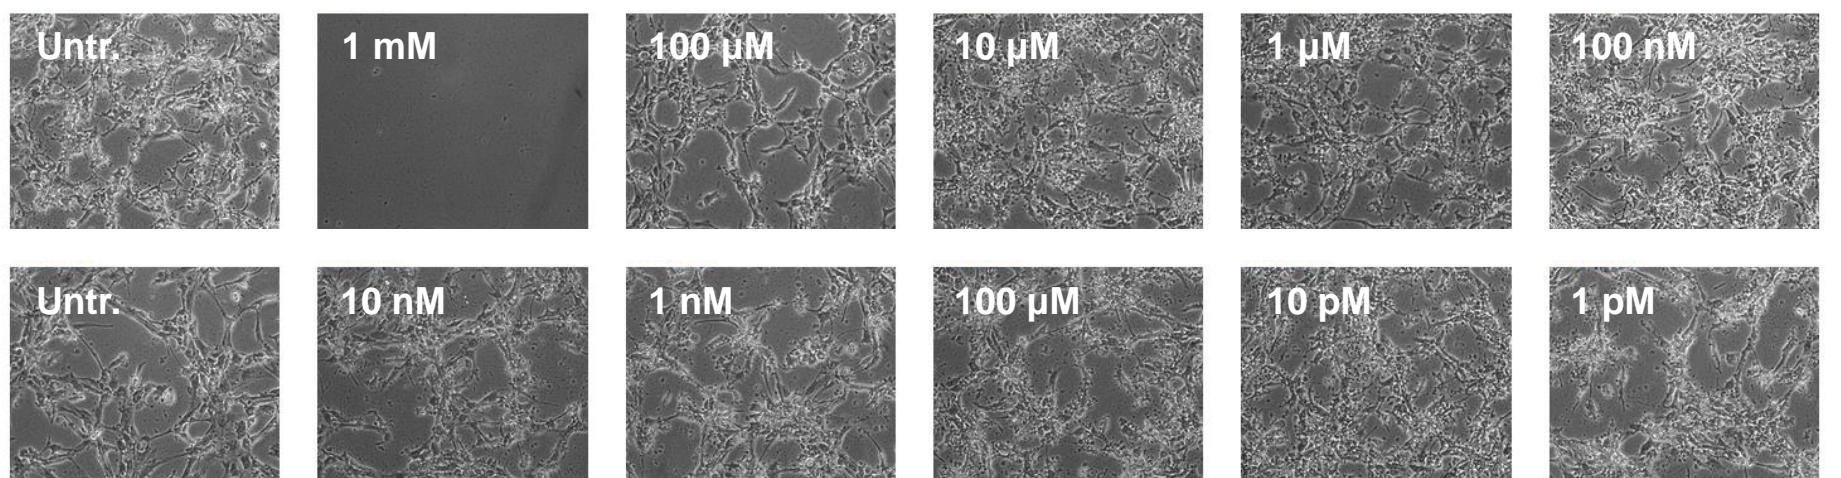

## E

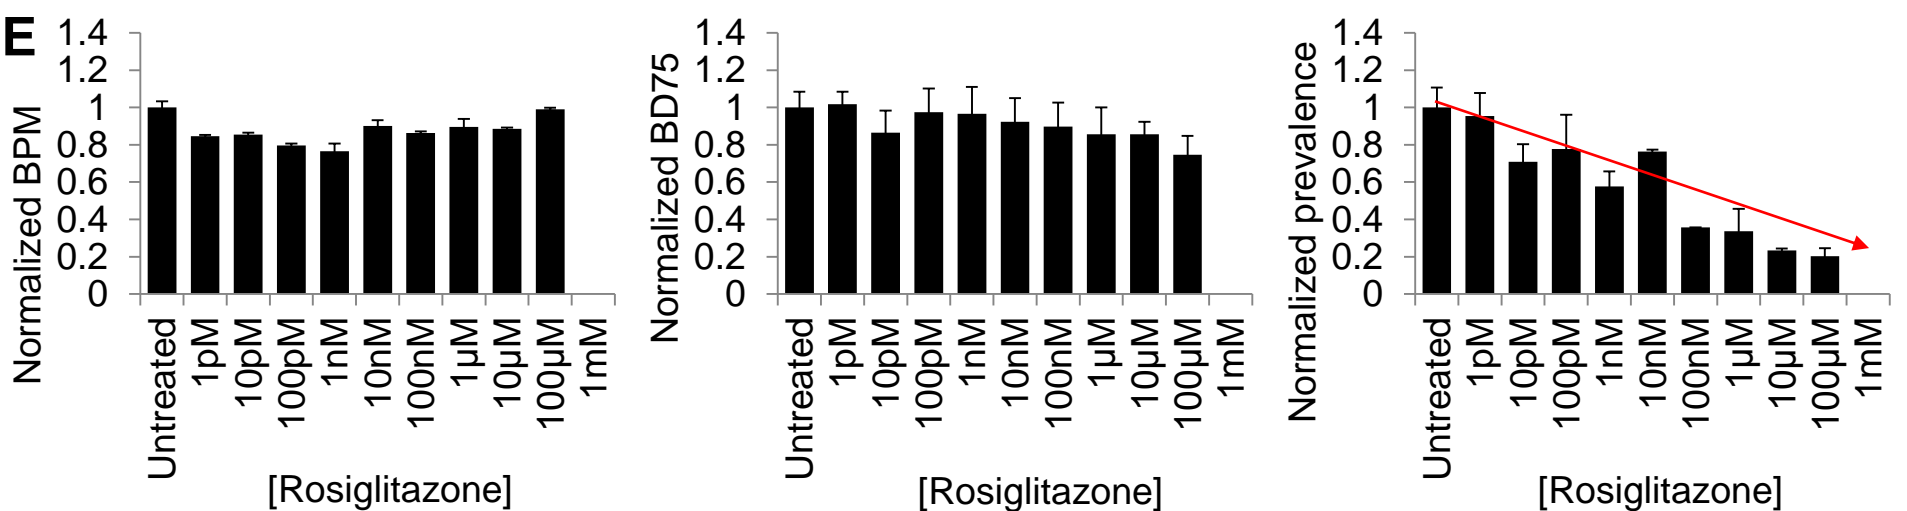

# Figure S6. Fold change in gene expression with tacrolimus and rosiglitazone.

**A**

Two-way t-test  $P=0.05$

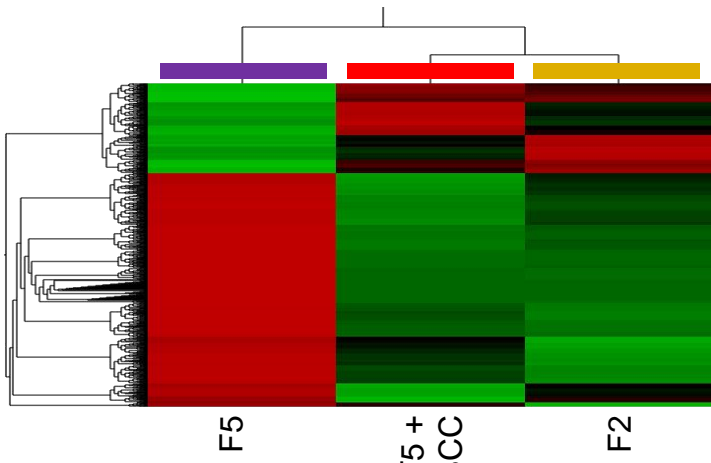

*Fold change* in RPKM in  
tacrolimus-treated vs. untreated  
samples per line, mean= 0, var= 1

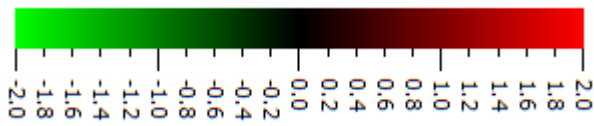

**B**

GO:xxx

Respiratory chain

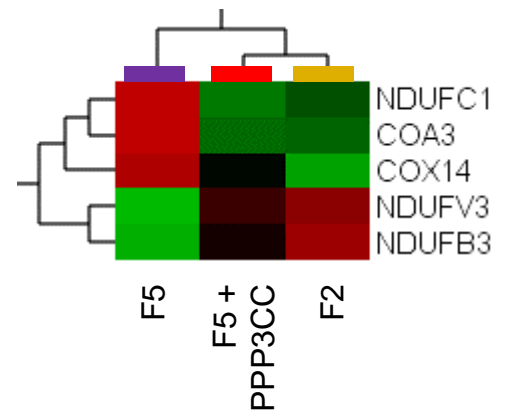

GO:0008152  
Metabolic processes

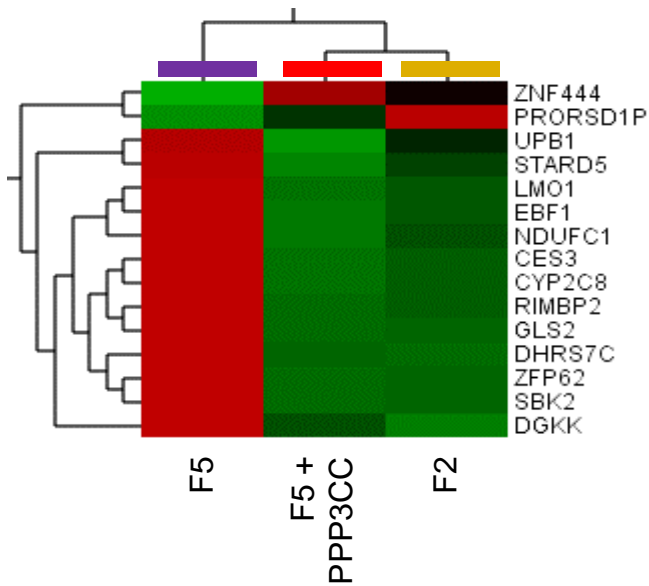

GO:0006979  
Oxidative stress

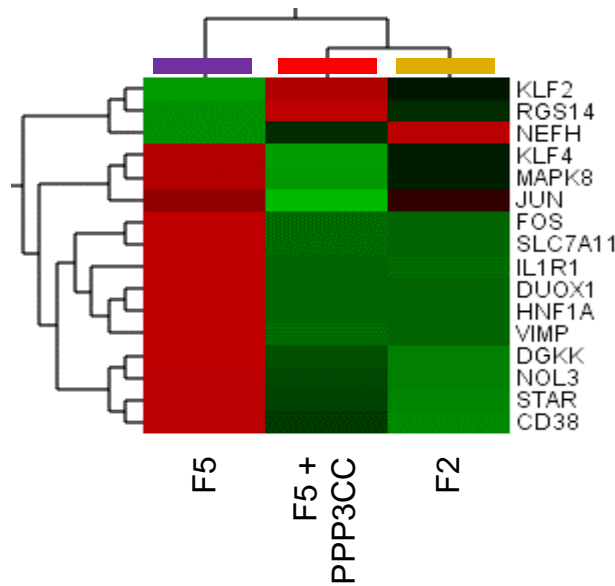

GO:0000165  
ERK/MAPK signaling

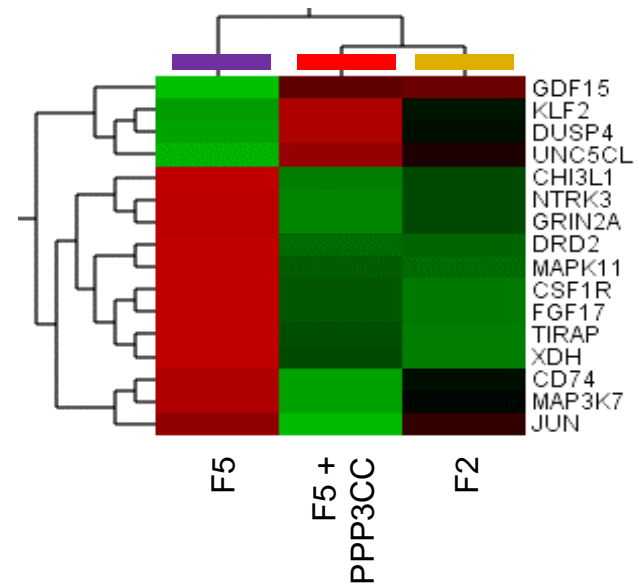

**C**

Two-way t-test  $P=0.05$

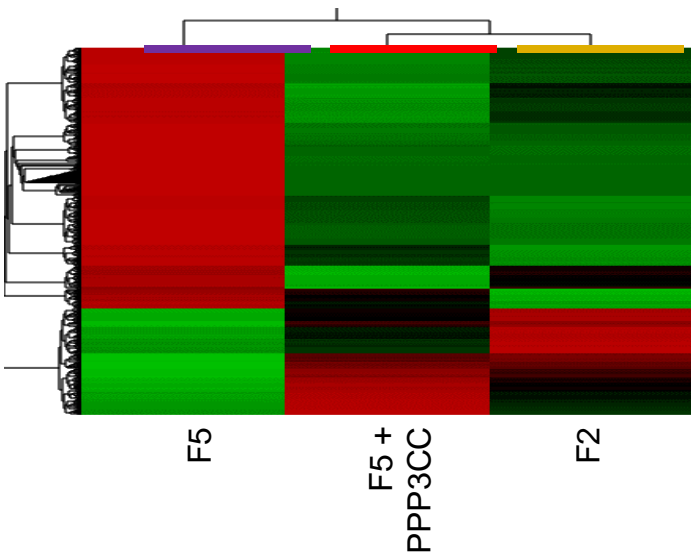

*Fold change* in RPKM in  
rosiglitazone-treated vs. untreated  
samples per line, mean= 0, var= 1

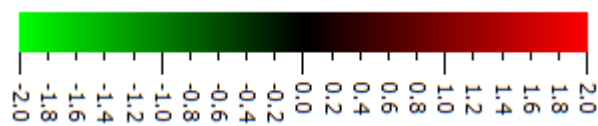

**D**

GO:xxx

Respiratory chain

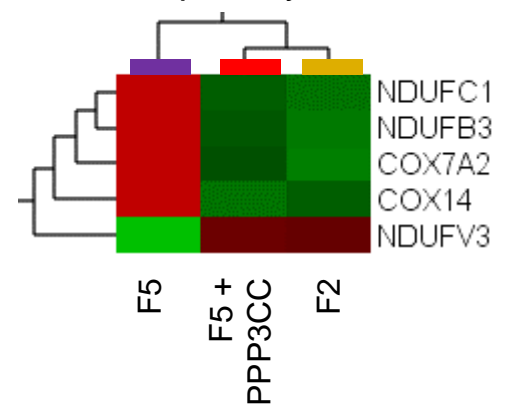

GO:0008152  
Metabolic processes

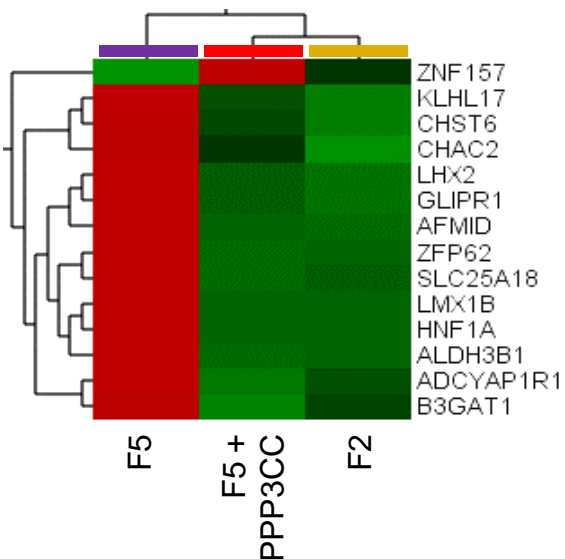

GO:0006979  
Oxidative stress

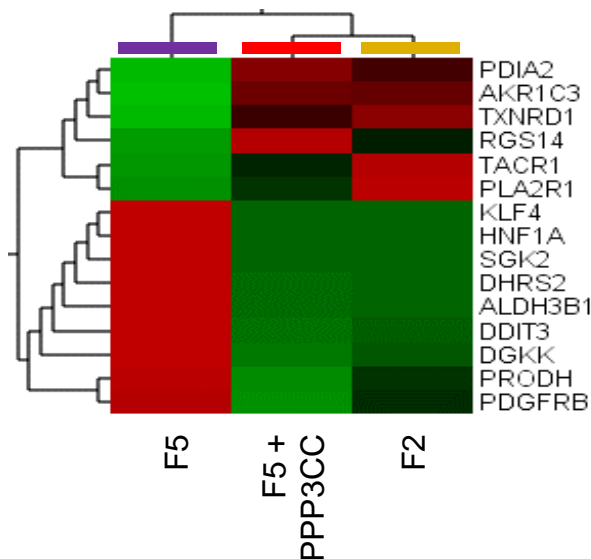

GO:0000165  
ERK/MAPK signaling

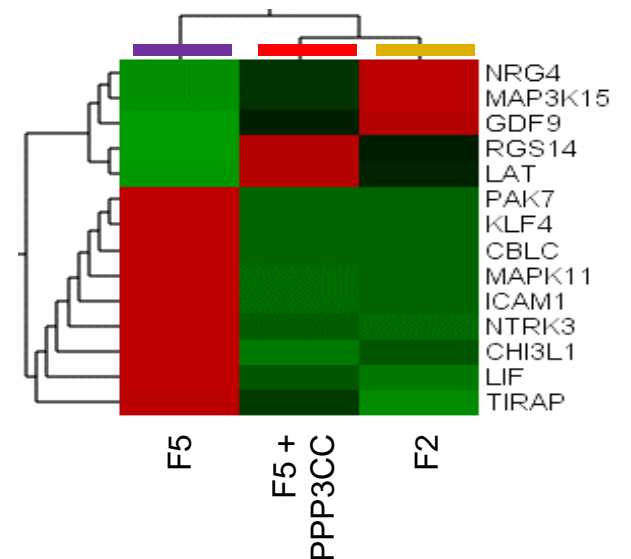

**Figure S7. Effects of tacrolimus or rosiglitazone treatment in hiPSC-ECs.**

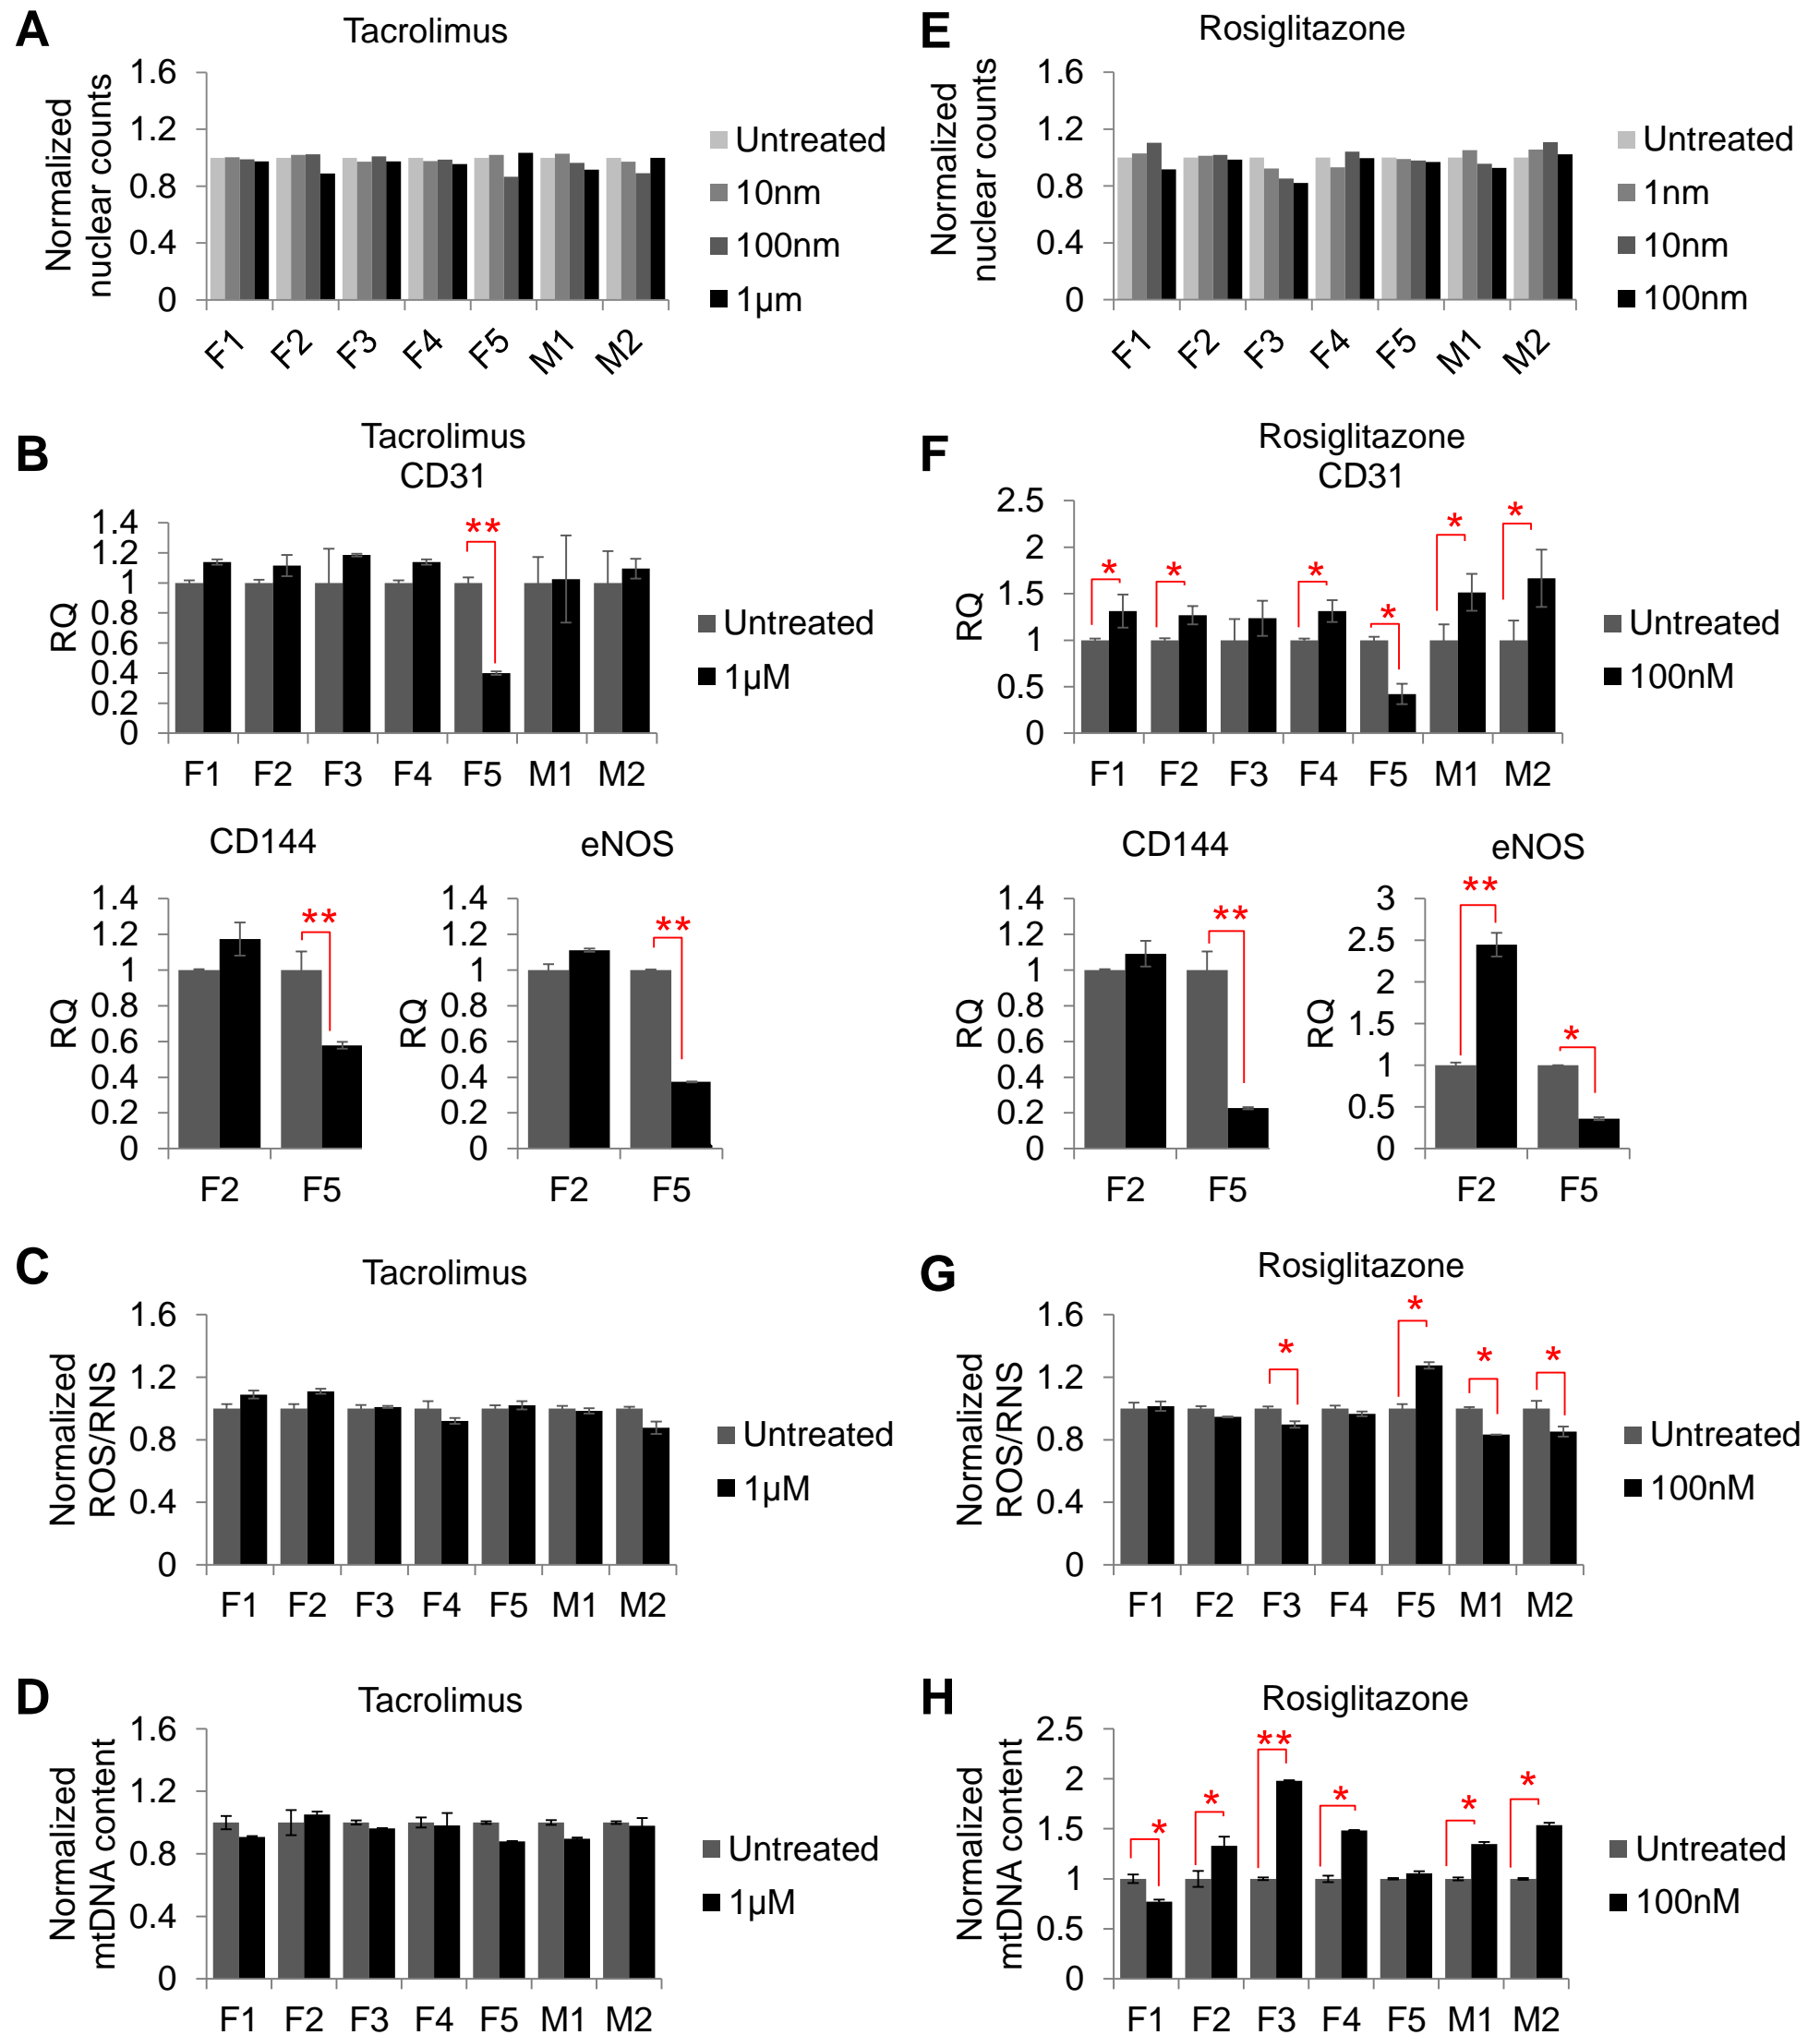

Supplement: NIHMS824580-supplement-01.pdf [file NIHMS824580-supplement-01.pdf]
